# Supplementary material for: The association between evidence of a predator threat and responsiveness to alarm calls in Western Australian magpies (Cracticus tibicen dorsalis)
Source: PeerJ. 2019 Aug 26;7:e7572. doi: 10.7717/peerj.7572 (PMC6714966; doi:10.7717/peerj.7572)
Supplement: Supplemental Information 1 — Behavioural responses to playback per individual [file peerj-07-7572-s001.xlsx]

## Sheet: Sheet1
Responses during reliable and unreliable playback- proportion of time focal bird spent vigilant 30 seconds after each alarm call
Bird ID	Sex	treatment	Call 1	Call 2	Call 3	Call 4	Call 5	Call 6	Call 7	Call 8	Order (which playback received first)
MRGO	F	Unreliable	50	50	33.3333	16.6667	33.3333	0	0	0	Unreliable
SPOT	M	Unreliable	46.6667	60	56.6667	60	10	16.6667	0	0	Reliable
MXXMMM	M	Unreliable	13.3333	10	53.3333	16.6667	0	16.6667	0	0	Unreliable
PMXRMX	M	Unreliable	10	63.3333	50	0	36.6667	26.6667	0	0	Reliable
MXXRRB	M	Unreliable	53.3333	46.6667	6.66667	33.3333	13.3333	0	0	13.3333	Reliable
OMGO	F	Unreliable	86.6667	63.3333	40	30	30	0	23.3333	0	Unreliable
BMXRYR	M	Unreliable	26.6667	6.66667	0	6.66667	13.3333	10	0	0	Unreliable
MXXGYY	M	Unreliable	13.3333	20	23.3333	6.66667	13.3333	0	13.3333	13.3333	Unreliable
MRGO	F	Reliable	33.3333	50	46.6667	43.3333	36.6667	26.6667	20	20
SPOT	M	Reliable	73.3333	56.6667	56.6667	56.6667	26.6667	30	76.6667	36.6667
MXXMMM	M	Reliable	70	46.6667	33.3333	20	73.3333	36.6667	100	46.6667
PMXRMX	M	Reliable	10	66.6667	23.3333	30	83.3333	46.6667	33.3333	56.6667
MXXRRB	M	Reliable	53.3333	23.3333	60	46.6667	66.6667	26.6667	53.3333	26.6667
OMGO	F	Reliable	26.6667	53.3333	36.6667	40	46.6667	53.3333	60	36.6667
BMXRYR	M	Reliable	83.3333	40	10	36.6667	100	30	70	16.6667
MXXGYY	M	Reliable	56.6667	56.6667	33.3333	16.6667	100	10	100	16.6667
Proportion of time bird spent vigilanc 60sec before and after the reliable and unreliable playb ack sequences (8 alarms with model predator for reliable)
Group ID	Bird ID	Sex	Treatment	Proportion vig before pb	Proportion vig after after pb
BWY	MRGO	F	unreliable playback	0	25.3968
ESC	SPOT	M	unreliable playback	19.3548	16.4179
FMR	MXXMMM	M	unreliable playback	8.92857	17.2414
KMP	PMXRMX	M	unreliable playback	23.2143	5.55556
LHP	MXXRRB	M	unreliable playback	2.94118	18.1818
MBG	OMGO	F	unreliable playback	12.3077	12.069
NH	BMXRYR	M	unreliable playback	25.4237	0
SS	MXXGYY	M	unreliable playback	0	14.0625
BWY	MRGO	F	reliable playback	14.0625	11.6667
ESC	SPOT	M	reliable playback	25	36.2069
FMR	MXXMMM	M	reliable playback	11.9403	54.9296
KMP	PMXRMX	M	reliable playback	0	23.2143
LHP	MXXRRB	M	reliable playback	20	23.2877
MBG	OMGO	F	reliable playback	18.8406	16.0714
NH	BMXRYR	M	reliable playback	7.35294	21.7391
SS	MXXGYY	M	reliable playback	0	27.2727
Recall test results- proportion of time birds spent vigilant 30 seconds after the reliable and unreliable alarm call
Group ID	Bird ID	Sex	proportion of time vigilant reliable	proportion of time vigilant unreliable			Order (which playback received first)
BWY	MRGO	F	56.6667	20			Reliable
ESC	SPOT	M	56.6667	33.3333			Unreliable
FMR	MXXMMM	M	70	43.3333			Reliable
KMP	PMXRMX	M	40	23.3333			Reliable
LHP	MXXRRB	M	76.6667	6.66667			Unreliable
MBG	OMGO	F	63.3333	40			Unreliable
NH	BMXRYR	M	30	33.3333			Unreliable
SS	MXXGYY	M	23.3333	13.3333			Unreliable
